# Supplementary material
Source: MDPI journal article supplement (https://www.mdpi.com/2075-163X/14/4/397)
Supplement: s1 [file s1]

Archive with 2 entries (2 files):
- minerals-2813283-supplementary/minerals-2813283-supplementary.pdf
- minerals-2813283-supplementary/minerals-2813283-supplementary.xlsx
