# Supplementary material
Source: MDPI journal article supplement (https://www.mdpi.com/2075-163X/14/4/397)
Supplement: s1 [file s1 › minerals-2813283-supplementary/minerals-2813283-supplementary.xlsx]

## Sheet: Sheet3
Supplementary Table 1
Temp. (oC)	Cum. 39Ar	40Ar/39Ar	37Ar/39Ar	Age (Ma)
Hwp 1 Biotite		J = 3.872 ± 0.053 (10-3)
498	0.28		(1.171 ± 0.042)
602	1.82	(1.186 ± 0.775)E+2	(1.403 ± 56.693)E-1	682 ± 371
705	12.58	(4.557 ± 0.118)E+2	(6.396 ± 15.729)E-2	1834 ± 34
789	32.38	(4.487 ± 0.098)E+2	(1.131 ± 0.083)E-1	1817 ± 30
847	43.56	(4.652 ± 0.140)E+2	(2.038 ± 0.061)E-1	1858 ± 38
897	50.7	(4.179 ± 0.127)E+2	(4.400 ± 0.093)E-1	1736 ± 37
951	57.13	(4.793 ± 0.236)E+2	(1.442 ± 0.766)E-1	1893 ± 60
999	62.43	(4.686 ± 0.281)E+2	(1.625 ± 0.238)E-1	1867 ± 71
1026	65.99	(4.372 ± 0.490)E+2	(3.031 ± 0.167)E-1	1787 ± 128
1046	69.41	(4.403 ± 0.433)E+2	(1.057 ± 1.542)E-1	1795 ± 112
1095	76.51	(4.710 ± 0.168)E+2	(1.888 ± 0.271)E-1	1873 ± 44
1196	93.27	(4.695 ± 0.112)E+2	(6.365 ± 7.667)E-2	1869 ± 32
Fused	100	(4.606 ± 0.221)E+2	(9.722 ± 0.575)E-2	1847 ± 58
Total 39Ar = 2.414 ± 0.015 (10-10 cc STP)			Total gas age = 1820 ± 21 (Ma)
Temp. (oC)	Cum. 39Ar	40Ar/39Ar	37Ar/39Ar	Age (Ma)
Hwp 2 Biotite		J = 4.575 ± 0.048 (10-3)
510	0.13	(1.417 ± 0.821)E+2	(1.918 ± 0.012)E+1	902 ± 411
605	28.39	(3.927 ± 0.033)E+2	(4.348 ± 197.860)	1855 ± 16
699	29.01	(3.631 ± 0.139)E+2	(7.517 ± 0.028)E+1	1766 ± 45
799	32.97	(4.083 ± 0.055)E+2	(7.932 ± 10.537)	1901 ± 20
848	40.07	(4.147 ± 0.057)E+2	(5.012 ± 0.383)	1919 ± 21
899	48.2	(4.104 ± 0.029)E+2	(4.221 ± 0.125)	1907 ± 15
950	55.88	(4.156 ± 0.094)E+2	(1.984 ± 0.304)	1922 ± 30
997	62.83	(4.034 ± 0.038)E+2	(2.371 ± 0.120)	1887 ± 17
1023	67.08	(4.039 ± 0.115)E+2	(4.823 ± 0.209)	1888 ± 36
1046	71.09	(3.877 ± 0.075)E+2	(2.904 ± 381)	1840 ± 25
1098	77.21	(4.049 ± 0.067)E+2	(2.771 ± 0.255)	1891 ± 23
1198	91.36	(4.128 ± 0.049)E+2	(2.279 ± 0.170)	1914 ± 19
Fused	100	(3.995 ± 0.046)E+2	(3.459 ± 0.163)	1875 ± 18
Total 39Ar = 1.068 ± 0.005 (10-9 cc STP)			Total gas age = 1885 ± 13 (Ma)
Temp. (oC)	Cum. 39Ar	40Ar/39Ar	37Ar/39Ar	Age (Ma)
Hwp 4 Biotite		J = 4.575 ± 0.048 (10-3)
503	1
604	1.95	(4.350 ± 0.735)E+2		1976 ± 203
704	13.86	(4.178 ± 0.128)E+2		1928 ± 38
810	37.76	(3.951 ± 0.118)E+2		1862 ± 37
849	45.19	(3.834 ± 0.143)E+2		1828 ± 44
894	50.36	(3.700 ± 0.180)E+2		1787 ± 57
948	58.3	(3.926 ± 0.153)E+2	(9.892 ± 0.258)	1855 ± 47
995	67.99	(4.246 ± 0.143)E+2	(7.238 ± 0.917)	1947 ± 42
1024	73.93	(4.105 ± 0.123)E+2	(9.993 ± 0.388)	1907 ± 37
1045	78.41	(3.878 ± 0.166)E+2	(1.401 ± 0.081)E+1	1841 ± 51
1085	87.36	(4.037 ± 0.124)E+2	(4.611 ± 3.606)	1887 ± 38
Fused	100	(3.817 ± 0.086)E+2	5.322 ± 0.505)	1823 ± 29
Total 39Ar = 1.357 ± 0.012 (10-10 cc STP)			Total gas age = 1866 ± 18 (Ma)
Temp. (oC)	Cum. 39Ar	40Ar/39Ar	37Ar/39Ar	Age (Ma)
Hwp 11 Biotite		J = 3.871 ± 0.053 (10-3)
495	0.74		(6.272 ± 0.249)E-1
598	3.24	(0 ± 2.369)E+2	(7.449 ± 5.809)E-1	0 ± 1654
704	12.17	(4.173 ± 0.539)E+2	(3.507 ± 11.933)E-1	1735 ± 145
795	29.47	(4.458 ± 0.309)E+2	(5.353 ± 44.404)E-2	1809 ± 81
842	41.1	(3.826 ± 0.439)E+2	(2.102 ± 0.080)E-2	1640 ± 124
896	49.83	(3.336 ± 0.660)E+2		1496 ± 202
944	57.01	(5.016 ± 0.676)E+2		1947 ± 161
995	63.43	(4.542 ± 0.530)E+2		1830 ± 135
1024	68.6	(4.577 ± 0.660)E+2		1839 ± 167
1058	73.1	(3.621 ± 0.726)E+2		1581 ± 212
1093	78.18	(4.192 ± 0.651)E+2		1740 ± 174
1190	93.07	(4.844 ± 0.373)E+2		1905 ± 92
Fused	100	(3.767 ± 0.691)E+2		1623 ± 197
Total 39Ar = 6.394 ± 0.064 (10-11 cc STP)			Total gas age = 1709 ± 49 (Ma)
Temp. (oC)	Cum. 39Ar	40Ar/39Ar	37Ar/39Ar	Age (Ma)
Hwp 12 Biotite		J = 4.985 ± 0.026 (10-3)
504	1.12	(2.732 ± 0.305)E+2	(1.636 ± 0.013)E+1	1550 ± 116
601	3.68	(4.062 ± 0.070)E+2	(1.015 ± 0.419)E+1	1997 ± 22
700	15.16	(3.916 ± 0.052)E+2	(3.724 ± 3.282)	1953 ± 17
745	27.9	(3.750 ± 0.070)E+2	(3.934 ± 0.277)	1902 ± 23
800	39.82	(3.900 ± 0.073)E+2	(4.135 ± 0.303)	1948 ± 23
894	58.28	(4.092 ± 0.056)E+2	(2.163 ± 0.339)	2006 ± 18
945	70.09	(4.252 ± 0.061)E+2	(4.444 ± 8.108)E-1	2052 ± 19
995	80.54	(4.469 ± 0.083)E+2	(7.801 ± 154.08)E-2	2114 ± 24
1022	86.37	(3.786 ± 0.049)E+2		1913 ± 16
1047	90.44	(4.076 ± 0.055)E+2	(4.574 ± 0.036)E-1	2001 ± 17
1075	97.11	(4.053 ± 0.046)E+2	(4.901 ± 6.936)E-1	1994 ± 15
Fused	100	(4.108 ± 0.071)E+2	(2.032 ± 0.022)E+2	2010 ± 22
Total 39Ar = 2.831 ± 0.012 (10-10 cc STP)			Total gas age = 1994 ± 9 (Ma)
Temp. (oC)	Cum. 39Ar	40Ar/39Ar	37Ar/39Ar	Age (Ma)
Hwp 14 Biotite		J = 4.985 ± 0.026 (10-3)
600	9.64	(1.751 ± 0.008)E+2	(4.916 ± 0.019)E-1	1132 ± 6
800	49.8	(3.561 ± 0.033)E+2	(5.219 ± 0.406)E-1	1841 ± 12
900	64.39	(3.930 ± 0.018)E+2	(5.529 ± 0.110)E-1	1957 ± 8
1000	95.45	(3.698 ± 0.020)E+2	(4.790 ± 0.142)E-1	1885 ± 9
1050	97.44	(3.743 ± 0.023)E+2	(4.669 ± 0.099)E-1	1899 ± 10
1100	99.32	(3.662 ± 0.032)E+2	(2.201 ± 2.915)E-1	1874 ± 12
1150	99.48	(2.885 ± 0.112)E+2		1608 ± 42
Fused	100	(3.516 ± 0.048)E+2		1827 ± 517
Total 39Ar = 9.862 ± 0.048 (10-10 cc STP)			Total gas age = 1817 ± 8 (Ma)
Temp. (oC)	Cum. 39Ar	40Ar/39Ar	37Ar/39Ar	Age (Ma)
Hwp 18 Biotite		J = 4.985 ± 0.026 (10-3)
514	2.51	(9.011 ± 2.955)E+1	(2.806 ± 0.038)	669 ± 183
598	3.27	(3.321 ± 0.453)E+2	(6.614 ± 0.103)E+1	1762 ± 154
715	9.1	(3.511 ± 0.065)E+2	(1.020 ± 5.230)E+1	1825 ± 22
800	17.77	(3.803 ± 0.068)E+2	(6.233 ± 1.384)	1918 ± 22
897	34.61	(3.953 ± 0.039)E+2	(6.055 ± 0.672)	1964 ± 13
965	45.11	(3.973 ± 0.038)E+2		1970 ± 13
1005	51.64	(3.790 ± 0.051)E+2		1914 ± 17
1024	70.22	(3.827 ± 0.074)E+2		1926 ± 24
1046	72.83	(3.761 ± 0.105)E+2		1905 ± 33
Fused	100	(3.859 ± 0.107)E+2		1935 ± 33
Total 39Ar = 1.325 ± 0.011 (10-10 cc STP)			Total gas age = 1907 ± 12 (Ma)
Temp. (oC)	Cum. 39Ar	40Ar/39Ar	37Ar/39Ar	Age (Ma)
Hwp 25 Biotite		J = 4.985 ± 0.026 (10-3)
504	1.04	(9.443 ± 3.027)E+1		696 ± 185
605	4.26	(3.044 ± 0.103)E+2		1666 ± 37
702	18.54	(3.614 ± 0.034)E+2	(5.661 ± 0.038)	1859 ± 12
798	39.83	(3.944 ± 0.029)E+2	(5.148 ± 0.520)	1962 ± 11
905	59.44	(4.040 ± 0.035)E+2	(3.967 ± 0.222)	1990 ± 12
953	70.86	(4.000 ± 0.043)E+2	(1.831 ± 0.748)	1978 ± 14
995	80.57	(4.002 ± 0.039)E+2	(2.465 ± 0.379)	1979 ± 13
1023	85.19	(3.979 ± 0.107)E+2	(4.768 ± 0.440)	1972 ± 33
1047	88.56	(3.846 ± 0.094)E+2	(5.127 ± 1.463)	1931 ± 30
1095	95.5	(3.971 ± 0.042)E+2	(4.912 ± 2.007)	1969 ± 14
1175	99.5	(3.947 ± 0.079)E+2	(1.589 ± 0.066)E+1	1962 ± 25
Fused	100	(3.075 ± 0.705)E+2		1676 ± 250
Total 39Ar = 1.376 ± 0.004 (10-10 cc STP)			Total gas age = 1939 ± 8 (Ma)
Temp. (oC)	Cum. 39Ar	40Ar/39Ar	37Ar/39Ar	Age (Ma)
Hwp 5 Amphibole		J = 4.575 ± 0.048 (10-3)
697	0.08	(1.417 ± 1.778)E+3	(4.388 ± 0.498)E+2	3631 ± 1961
798	0.2	(5.601 ± 10.369)E+2	(7.356 ± 1.562)E+2	2292 ± 2402
897	1.02	(4.709 ± 1.953)E+2	(4.208 ± 136.26)E+1	2072 ± 511
927	3.29	(2.309 ± 0.625)E+2	(1.880 ± 1.814)E+1	1301 ± 251
959	19.4	(3.708 ± 0.094)E+2	(5.925 ± 10.488)	1790 ± 31
990	72.56	(3.852 ± 0.088)E+2	(7.254 ± 2.340)	1833 ± 29
1024	89.65	(3.662 ± 0.120)E+2	(3.394 ± 0.592)	1775 ± 39
1089	92.1	(3.044 ± 0.442)E+2		1574 ± 153
Fused	100	(3.171 ± 0.209)E+2	(1.665 ± 0.058)	1617 ± 71
Total 39Ar = 1.043 ± 0.013 (10-10 cc STP)			Total gas age = 1789 ± 23 (Ma)
Temp. (oC)	Cum. 39Ar	40Ar/39Ar	37Ar/39Ar	Age (Ma)
Hwp 9 Amphibole		J = 4.575 ± 0.048 (10-3)
709	20.58	(2.397 ± 0.177)E+2	(4.076 ± 0.045)E+1	1336 ± 70
796	37.86	(4.278 ± 0.250)E+2	(5.127 ± 0.188)E+1	1956 ± 71
899	60.29	(4.153 ± 0.214)E+2	(4.106 ± 0.422)E+1	1921 ± 62
932	71.1	(3.476 ± 0.403)E+2	(7.310 ± 0.136)E+1	1717 ± 129
959	78.83	(3.664 ± 0.559)E+2	(7.618 ± 0.372)E+1	1776 ± 173
983	84.52	(2.319 ± 0.691)E+2	(2.844 ± 2.301)E+1	1305 ± 277
1021	90.85	(2.287 ± 0.649)E+2	(2.717 ± 0.870)E+1	1292 ± 262
1048	94.19	(2.162 ± 1.268)E+2	(9.138 ± 0.320)E+1	1241 ± 526
1075	97.12	(1.675 ± 1.272)E+2	(1.423 ± 0.127)E+2	1026 ± 594
Fused	100	(1.340 ± 1.355)E+2	(1.164 ± 0.300)E+2	862 ± 694
Total 39Ar = 3.187 ± 0.025 (10-11 cc STP)			Total gas age = 1648 ± 45 (Ma)
Temp. (oC)	Cum. 39Ar	40Ar/39Ar	37Ar/39Ar	Age (Ma)
Hwp 10 Amphibole		J = 3.872 ± 0.053 (10-3)
701	1.01		(5.009 ± 0.379)
802	1.87	(4.922 ± 692.76)E+0	(1.652 ± 0.129)E+1	34 ± 4748
892	3.34		(4.842 ± 3.850)
924	6.04		(3.944 ± 1.010)
962	10.38		(4.777 ± 0.323)
989	18.69	(4.332 ± 0.040)E+2	(4.869 ± 0.282)	1777 ± 106
1013	36.93	(4.589 ± 0.046)E+2	(4.587 ± 0.189)	1842 ± 116
1045	79.41	(4.773 ± 0.217)E+2	(4.778 ± 0.306)	1888 ± 56
1074	84.01	(3.698 ± 2.046)E+2	(4.500 ± 0.039)	1603 ± 588
Fused	100	(3.952 ± 0.655)E+2	(4.782 ± 0.513)	1675 ± 181
Total 39Ar = 3.505 ± 0.026 (10-11 cc STP)			Total gas age = 1580 ± 68 (Ma)
Temp. (oC)	Cum. 39Ar	40Ar/39Ar	37Ar/39Ar	Age (Ma)
Hwp 11 Amphibole		J = 3.872 ± 0.053 (10-3)
881	14.11	(3.459 ± 0.931)E+2	(3.818 ± 0.139)	1533 ± 278
901	41.97	(3.262 ± 0.595)E+2	(3.997 ± 0.213)	1473 ± 184
923	71.33	(4.634 ± 0.421)E+2	(4.201 ± 0.098)	1854 ± 106
954	76.13		(5.959 ± 0.134)
965	78.21	(6.441 ± 6.224)E+2	(1.222 ± 0.241)E+1	2257 ± 1244
985	80.44		(7.535 ± 1.696)
1002	82.14		(6.050 ± 1.605)
1014	86.57	(4.099 ± 3.508)E+2	(5.421 ± 1.438)	1715 ± 947
Fused	100	(5.512 ± 1.431)E+2	(5.713 ± 7.284)	2061 ± 319
Total 39Ar = 1.539 ± 0.029 (10-11 cc STP)			Total gas age = 1598 ± 126 (Ma)
Temp. (oC)	Cum. 39Ar	40Ar/39Ar	37Ar/39Ar	Age (Ma)
Hwp 12 Amphibole (a)		J = 4.575 ± 0.048 (10-3)
698	8.81	(3.519 ± 0.079)E+2	(2.281 ± 0.049)	1731 ± 27
799	22.12	(3.738 ± 0.063)E+2	(1.762 ± 0.479)	1798 ± 23
896	40.57	(3.950 ± 0.044)E+2	(2.622 ± 0.192)	1862 ± 18
924	51.52	(3.847 ± 0.062)E+2	(2.373 ± 0.139)	1831 ± 22
953	61.31	(3.914 ± 0.133)E+2	(2.662 ± 0.226)	1852 ± 41
985	71.75	(3.951 ± 0.054)E+2	(1.909 ± 0.405)	1862 ± 20
1011	80.8	(3.832 ± 0.090)E+2	(3.244 ± 0.227)	1827 ± 30
1048	88.29	(3.868 ± 0.096)E+2	(9.637 ± 0.232)	1838 ± 31
1108	95.32	(3.848 ± 0.132)E+2	(1.039 ± 0.049)E+1	1832 ± 41
1195	98.59	(3.633 ± 0.155)E+2	(1.956 ± 0.041)E+1	1766 ± 50
Fused	100	(3.580 ± 0.321)E+2	(5.091 ± 0.101)E+1	1750 ± 101
Total 39Ar = 3.804 ± 0.023 (10-10 cc STP)			Total gas age = 1827 ± 14 (Ma)
Temp. (oC)	Cum. 39Ar	40Ar/39Ar	37Ar/39Ar	Age (Ma)
Hwp 12 Amphibole (b)		J = 3.872 ± 0.053 (10-3)
796	2.92	(1.225 ± 0.991)E+2	(8.545 ± 0.147)E-1	700 ± 470
851	4.55		(1.565 ± 0.071)
902	7.8	(3.944 ± 1.168)E+2	(2.914 ± 0.099)	1672 ± 323
933	12.77	(2.955 ± 0.871)E+2	(3.261 ± 0.098)	1389 ± 282
962	31.47	(5.289 ± 0.106)E+2	(4.072 ± 0.367)	2011 ± 30
987	60.23	(5.176 ± 0.142)E+2	(3.810 ± 0.170)	1984 ± 37
1017	76.43	(4.638 ± 0.312)E+2	(3.508 ± 0.109)	1855 ± 79
1048	79.71	(4.502 ± 1.263)E+2	(2.730 ± 0.058)	1820 ± 322
Fused	100	(4.610 ± 0.210)E+2	(3.227 ± 0.465)	1848 ± 55
Total 39Ar = 7.214 ± 0.066 (10-11 cc STP)			Total gas age = 1839 ± 33 (Ma)
Temp. (oC)	Cum. 39Ar	40Ar/39Ar	37Ar/39Ar	Age (Ma)
Hwp 14 Amphibole		J = 3.872 ± 0.053 (10-3)
809	0.42	(9.190 ± 2.022)E+3		6494 ± 387
896	7.17	(5.382 ± 0.469)E+2	(4.425 ± 0.105)	2032 ± 108
930	24.45	(5.402 ± 0.171)E+2	(4.259 ± 0.149)	2036 ± 42
955	64.05	(5.161 ± 0.068)E+2	(4.166 ± 0.212)	1981 ± 23
986	73.01	(5.189 ± 0.219)E+2	(4.396 ± 0.033)	1987 ± 54
1017	75.97	(1.924 ± 0.666)E+2	(4.585 ± 0.089)	1004 ± 267
1047	77.84	(1.516 ± 1.188)E+2	(4.245 ± 0.111)	846 ± 519
1098	85.17	(5.043 ± 0.346)E+2	(4.903 ± 0.191)	1953 ± 83
Fused	100	(4.984 ± 0.214)E+2	(4.656 ± 0.158)E+1	1939 ± 54
Total 39Ar = 1.028 ± 0.007 (10-10 cc STP)			Total gas age = 1948 ± 24 (Ma)
Temp. (oC)	Cum. 39Ar	40Ar/39Ar	37Ar/39Ar	Age (Ma)
Hwp 15 Amphibole		J = 3.872 ± 0.053 (10-3)
702	2.24		(5.415 ± 0.726)
794	4.37		(7.816 ± 1.340)
899	7.56	(1.501 ± 2.803)E+2	(6.363 ± 0.913)	826 ± 1238
930	10.44	(2.959 ± 3.901)E+2	(1.269 ± 0.014)E+1	1377 ± 1270
958	14.37	(2.085 ± 1.718)E+2	(1.079 ± 0.045)E+1	1068 ± 664
992	24.75	(5.199 ± 0.917)E+2	(1.226 ± 0.086)E+1	1990 ± 213
1023	65.03	(4.738 ± 0.121)E+2	(1.175 ± 0.068)E+1	1880 ± 34
1052	79.43	(4.056 ± 0.462)E+2	(1.076 ± 0.036)E+1	1703 ± 126
1106	80.98	(5.964 ± 6.142)E+2	(1.012 ± 0.137)E+1	2159 ± 1297
Fused	100	(5.095 ± 0.419)E+2	(9.023 ± 1.137)	1965 ± 100
Total 39Ar = 2.889 ± 0.029 (10-11 cc STP)			Total gas age = 1731 ± 73 (Ma)
Temp. (oC)	Cum. 39Ar	40Ar/39Ar	37Ar/39Ar	Age (Ma)
Hwp 16 Amphibole		J = 3.872 ± 0.053 (10-3)
710	0.44	(0 ± 1.438)E+3	(5.858 ± 0.413)	0 ± 10040
797	0.55	(0 ± 1.974)E+4	(2.071 ± 2.220)E+1	0 ± 137874
899	2.39		(4.984 ± 22.942)
934	5.79		(5.575 ± 0.454)
962	8.88		(5.726 ± 0.172)
992	47.46	(4.944 ± 0.192)E+2	(5.093 ± 1.919)	1930 ± 49
1024	86.75	(4.871 ± 0.187)E+2	(4.874 ± 0.089)	1912 ± 48
1051	89.71	(1.875 ± 2.446)E+2	(6.543 ± 0.487)	985 ± 990
1098	92.1	(9.167 ± 35.995)E+1	(7.316 ± 0.357)	548 ± 1856
Fused	100	(4.325 ± 0.869)E+2	(6.288 ± 0.415)E+1	1775 ± 227
Total 39Ar = 4.045 ± 0.039 (10-11 cc STP)			Total gas age = 1683 ± 66 (Ma)
Temp. (oC)	Cum. 39Ar	40Ar/39Ar	37Ar/39Ar	Age (Ma)
Hwp 18 Amphibole		J = 4.985 ± 0.026 (10-3)
700	0.03	(3.035 ± 1.281)E+4		9067 ± 756
800	0.04	(7.762 ± 55.542)E+2	(-2.582 ± 4.250)E+3	2856 ± 10258
900	7.04	(3.942 ± 0.073)E+2		1961 ± 23
950	66.4	(4.679 ± 0.032)E+2	(8.436 ± 0.056)	2172 ± 11
1035	92.34	(4.175 ± 0.025)E+2	(1.333 ± 0.024)E+1	2030 ± 10
1060	93.84	(4.506 ± 0.221)E+2	(1.371 ± 0.022)E+2	2124 ± 62
1100	98.39	(3.234 ± 0.100)E+2	(4.149 ± 2.321)E+1	1732 ± 35
Fused	100	(3.962 ± 0.213)E+2	(1.377 ± 0.031)E+2	1967 ± 65
Total 39Ar = 1.671 ± 0.022 (10-11 cc STP)			Total gas age = 2127 ± 10 (Ma)
Temp. (oC)	Cum. 39Ar	40Ar/39Ar	37Ar/39Ar	Age (Ma)
Hwp 25 Amphibole		J = 4.985 ± 0.026 (10-3)
700	0.42		(8.393 ± 0.176)E+1
800	0.84		(4.441 ± 4.010)E+1
897	9.58	(3.885 ± 0.081)E+2	(3.387 ± 175.63)	1944 ± 25
947	53.47	(3.877 ± 0.057)E+2	(4.024 ± 0.665)	1941 ± 18
1008	92.32	(4.046 ± 0.036)E+2	(3.684 ± 0.227)	1992 ± 12
1040	94.32	(4.532 ± 0.256)E+2	(2.580 ± 0.033)	2131 ± 71
1070	95.69	(4.907 ± 0.326)E+2	(1.115 ± 9105.3)E-1	2232 ± 85
Fused	100	(4.221 ± 0.099)E+2	(1.559 ± 36.756)E-1	2043 ± 29
Total 39Ar = 9.412 ± 0.065 (10-11 cc STP)			Total gas age = 1967 ± 11 (Ma)
